# Supplementary material for: Impact of Low-Cost Point-of-Use Water Treatment Technologies on Enteric Infections and Growth among Children in Limpopo, South Africa
Source: PubMed Central journal article supplement (PMC7543807; doi:10.4269/ajtmh.20-0228), 2020-08-24
Supplement: tpmd200228.SD1.pdf [file tpmd200228.SD1.pdf]

## **Supplemental material**

### **Impact of low-cost point-of-use water treatment technologies on enteric infections and linear growth among children in Limpopo, South Africa**

Courtney L. Hill, Kelly McCain, Mzwakhe E. Nyathi, Joshua N. Edokpayi, David M. Kahler, Darwin J. Operario, David D.J. Taylor, Natasha C. Wright, James A. Smith, Richard L. Guerrant, Amidou Samie, Rebecca A. Dillingham, Pascal O. Bessong, and Elizabeth T. Rogawski McQuade

**Table S1.** Targeted genes for amplification in real-time PCR assays.

|          | Pathogen                                     | Gene                                 |
|----------|----------------------------------------------|--------------------------------------|
| Virus    | Adenovirus                                   | Hexon gene                           |
| Bacteria | EAEC*                                        | <i>aaiC</i> , <i>aatA</i>            |
|          | EHEC/EPEC*                                   | <i>eae</i>                           |
|          | ETEC*                                        | <i>LT</i> , <i>STh</i> or <i>STp</i> |
|          | <i>Campylobacter jejuni</i> / <i>C. coli</i> | <i>cadF</i>                          |
|          | <i>Shigella</i> /EIEC                        | <i>ipaH</i>                          |
| Protozoa | <i>Cryptosporidium</i>                       | 18S rRNA                             |
|          | <i>Giardia</i>                               | 18S rRNA                             |

\**E. coli* pathotypes were defined as follows: EAEC (*aaiC*, or *aatA*, or both), EHEC/EPEC (*eae*; includes typical and atypical EPEC), ETEC (*STh*, *STp*, or *LT*).

EAEC: enteroaggregative *E. coli*; EHEC: enterohemorrhagic *E. coli*; EPEC: enteropathogenic *E. coli*;  
ETEC: enterotoxigenic *E. coli*; EIEC: enteroinvasive *E. coli*

**Table S2.** Baseline characteristics of 404 study participants who did and did not complete follow-up to 24 months.

|                                                        | Completed follow-up (n=290) | Dropped out before 24 months (n=114) | Overall (n=404) |
|--------------------------------------------------------|-----------------------------|--------------------------------------|-----------------|
| <i>Demographic/Household Characteristics</i>           |                             |                                      |                 |
| Mother's age (years)                                   |                             |                                      |                 |
| Mean (SD)                                              | 28.3 (± 6.8)                | 26.7 (± 6.2)                         | 27.8 (± 6.7)    |
| Highest school grade level of mother, n (%)            |                             |                                      |                 |
| Primary                                                | 10 (3.4%)                   | 4 (3.5%)                             | 14 (3.5%)       |
| Secondary                                              | 166 (57.2%)                 | 71 (62.3%)                           | 237 (58.7%)     |
| Matriculation                                          | 71 (24.5%)                  | 26 (22.8%)                           | 97 (24.0%)      |
| Undergraduate                                          | 27 (9.3%)                   | 9 (7.9%)                             | 36 (8.9%)       |
| Post-graduate                                          | 13 (4.5%)                   | 2 (1.8%)                             | 15 (3.7%)       |
| Missing                                                | 3 (1.0%)                    | 2 (1.8%)                             | 5 (1.2%)        |
| Highest school grade level of head of household, n (%) |                             |                                      |                 |
| None                                                   | 16 (5.5%)                   | 5 (4.4%)                             | 21 (5.2%)       |
| Primary                                                | 68 (23.4%)                  | 35 (30.7%)                           | 103 (25.5%)     |
| Secondary                                              | 131 (45.2%)                 | 48 (42.1%)                           | 179 (44.3%)     |
| Matriculation                                          | 51 (17.6%)                  | 16 (14.0%)                           | 67 (16.6%)      |
| Undergraduate                                          | 13 (4.5%)                   | 5 (4.4%)                             | 18 (4.5%)       |
| Post-graduate                                          | 11 (3.8%)                   | 5 (4.4%)                             | 16 (4.0%)       |
| Relationship of head of household to child, n (%)      |                             |                                      |                 |
| Father                                                 | 104 (35.9%)                 | 31 (27.2%)                           | 135 (33.4%)     |
| Mother                                                 | 38 (13.1%)                  | 24 (21.1%)                           | 62 (15.3%)      |
| Grandmother                                            | 88 (30.3%)                  | 36 (31.6%)                           | 124 (30.7%)     |
| Grandfather                                            | 56 (19.3%)                  | 18 (15.8%)                           | 74 (18.3%)      |
| Sibling                                                | 0 (0.0%)                    | 1 (0.9%)                             | 1 (0.2%)        |
| Other                                                  | 4 (1.4%)                    | 4 (3.5%)                             | 8 (2.0%)        |
| Socioeconomic Status Score (WAMI)                      |                             |                                      |                 |
| Mean (SD)                                              | 0.79 (± 0.11)               | 0.78 (± 0.12)                        | 0.78 (± 0.11)   |
| Monthly household income (ZAR)                         |                             |                                      |                 |
| Mean (SD)                                              | 1932 (± 2047)               | 1889 (± 1748)                        | 1920 (± 1965)   |
| Adults over 15 in household                            |                             |                                      |                 |
| Mean (SD)                                              | 3.1 (± 1.5)                 | 2.9 (± 1.4)                          | 3.0 (± 1.5)     |
| Children under 15 in household                         |                             |                                      |                 |
| Mean (SD)                                              | 2.4 (± 1.2)                 | 2.4 (± 1.2)                          | 2.4 (± 1.2)     |
| Access to electricity in household, n (%)              |                             |                                      |                 |
| No                                                     | 10 (3.4%)                   | 6 (5.3%)                             | 16 (4.0%)       |
| Yes                                                    | 280 (96.6%)                 | 108 (94.7%)                          | 388 (96.0%)     |
| Crowded household (>2/room for sleeping), n (%)        |                             |                                      |                 |
| No                                                     | 146 (50.3%)                 | 55 (48.2%)                           | 201 (49.8%)     |

|                                                                |                    |                    |                    |
|----------------------------------------------------------------|--------------------|--------------------|--------------------|
| Yes                                                            | 144 (49.7%)        | 59 (51.8%)         | 203 (50.2%)        |
| <b>Main material of house floor, n (%)</b>                     |                    |                    |                    |
| Earth/sand/clay/mud/dung                                       | 6 (2.1%)           | 3 (2.6%)           | 9 (2.2%)           |
| Ceramic tiles or vinyl                                         | 23 (7.9%)          | 6 (5.3%)           | 29 (7.2%)          |
| Cement or concrete                                             | 261 (90.0%)        | 105 (92.1%)        | 366 (90.6%)        |
| <i>Water Use Practices</i>                                     |                    |                    |                    |
| <b>Primary drinking water source, n (%)</b>                    |                    |                    |                    |
| Municipal                                                      | 111 (38.3%)        | 57 (50.0%)         | 168 (41.6%)        |
| Surface water from tap/pipe                                    | 110 (37.9%)        | 36 (31.6%)         | 146 (36.1%)        |
| Directly from surface water                                    | 18 (6.2%)          | 9 (7.9%)           | 27 (6.7%)          |
| Groundwater                                                    | 43 (14.8%)         | 5 (4.4%)           | 48 (11.9%)         |
| Unknown/Other                                                  | 8 (2.8%)           | 7 (6.1%)           | 15 (3.7%)          |
| <b>Length of time to collect water (minutes)</b>               |                    |                    |                    |
| Mean (SD)                                                      | 29.7 ( $\pm$ 49.9) | 19.2 ( $\pm$ 30.5) | 26.7 ( $\pm$ 45.4) |
| <b>Typical point-of-use drinking water treatment, n (%)</b>    |                    |                    |                    |
| Let stand and settle                                           | 6 (2.1%)           | 5 (4.4%)           | 11 (2.7%)          |
| Add bleach/chlorine                                            | 11 (3.8%)          | 4 (3.5%)           | 15 (3.7%)          |
| Boil                                                           | 24 (8.3%)          | 9 (7.9%)           | 33 (8.2%)          |
| Other                                                          | 2 (0.7%)           | 1 (0.9%)           | 3 (0.7%)           |
| None                                                           | 247 (85.2%)        | 95 (83.3%)         | 342 (84.7%)        |
| <b>Drinking water storage vessel type, n (%)</b>               |                    |                    |                    |
| Metal buckets                                                  | 6 (2.1%)           | 5 (4.4%)           | 11 (2.7%)          |
| Plastic buckets                                                | 119 (41.0%)        | 43 (37.7%)         | 162 (40.1%)        |
| Jerrycan                                                       | 145 (50.0%)        | 55 (48.2%)         | 200 (49.5%)        |
| Plastic bottles                                                | 4 (1.4%)           | 1 (0.9%)           | 5 (1.2%)           |
| Other                                                          | 16 (5.5%)          | 10 (8.8%)          | 26 (6.4%)          |
| <b>Covered water storage vessels, n (%)</b>                    |                    |                    |                    |
| No                                                             | 52 (17.9%)         | 24 (21.1%)         | 76 (18.8%)         |
| Yes                                                            | 238 (82.1%)        | 90 (78.9%)         | 328 (81.2%)        |
| <b>Method of collecting drinking water from storage, n (%)</b> |                    |                    |                    |
| Pour directly                                                  | 14 (4.8%)          | 7 (6.1%)           | 21 (5.2%)          |
| Use cup with handle                                            | 205 (70.7%)        | 76 (66.7%)         | 281 (69.6%)        |
| Use cup with hands                                             | 63 (21.7%)         | 29 (25.4%)         | 92 (22.8%)         |
| Use spigot                                                     | 3 (1.0%)           | 1 (0.9%)           | 4 (1.0%)           |
| Other                                                          | 5 (1.7%)           | 1 (0.9%)           | 6 (1.5%)           |
| <b>Continuous main water supply, n (%)</b>                     |                    |                    |                    |
| Continuous                                                     | 74 (25.5%)         | 29 (25.4%)         | 103 (25.5%)        |
| Sometimes interrupted                                          | 216 (74.5%)        | 85 (74.6%)         | 301 (74.5%)        |
| <b>Improved toilet facility, n (%)</b>                         |                    |                    |                    |
| Unimproved                                                     | 19 (6.6%)          | 6 (5.3%)           | 25 (6.2%)          |
| Improved                                                       | 271 (93.4%)        | 108 (94.7%)        | 379 (93.8%)        |

|                                                       |                     |                     |                     |
|-------------------------------------------------------|---------------------|---------------------|---------------------|
| Frequency of handwashing after using toilet, n (%)    |                     |                     |                     |
| Never                                                 | 11 (3.8%)           | 3 (2.6%)            | 14 (3.5%)           |
| Rarely                                                | 41 (14.1%)          | 15 (13.2%)          | 56 (13.9%)          |
| Often                                                 | 31 (10.7%)          | 7 (6.1%)            | 38 (9.4%)           |
| Always                                                | 207 (71.4%)         | 89 (78.1%)          | 296 (73.3%)         |
| <i>Child Characteristics</i>                          |                     |                     |                     |
| Diarrhea in primary study child in last 7 days, n (%) |                     |                     |                     |
| No                                                    | 230 (79.3%)         | 89 (78.1%)          | 319 (79.0%)         |
| Yes                                                   | 60 (20.7%)          | 25 (21.9%)          | 85 (21.0%)          |
| Age of primary study child at baseline (years), n (%) |                     |                     |                     |
| <1                                                    | 103 (35.5%)         | 52 (45.6%)          | 155 (38.4%)         |
| 1-2                                                   | 107 (36.9%)         | 41 (36.0%)          | 148 (36.6%)         |
| 2-3                                                   | 80 (27.6%)          | 21 (18.4%)          | 101 (25.0%)         |
| Length/height-for-age z-score at baseline             |                     |                     |                     |
| Mean (SD)                                             | -1.34 ( $\pm$ 1.26) | -1.46 ( $\pm$ 1.34) | -1.38 ( $\pm$ 1.28) |
| Missing                                               | 9 (3.1%)            | 1 (0.9%)            | 10 (2.5%)           |
| Weight-for-age z-score at baseline                    |                     |                     |                     |
| Mean (SD)                                             | -0.32 ( $\pm$ 1.17) | -0.38 ( $\pm$ 1.34) | -0.34 ( $\pm$ 1.22) |
| Missing                                               | 1 (0.3%)            | 0 (0%)              | 1 (0.2%)            |
| Height-for-weight z-score at baseline                 |                     |                     |                     |
| Mean (SD)                                             | 0.58 ( $\pm$ 1.37)  | 0.52 ( $\pm$ 1.49)  | 0.56 ( $\pm$ 1.41)  |
| Missing                                               | 10 (3.4%)           | 1 (0.9%)            | 11 (2.7%)           |
| Stunted at baseline, n (%)                            |                     |                     |                     |
| No                                                    | 200 (69.0%)         | 69 (60.5%)          | 269 (66.6%)         |
| Yes                                                   | 81 (27.9%)          | 44 (38.6%)          | 125 (30.9%)         |
| Missing                                               | 9 (3.1%)            | 1 (0.9%)            | 10 (2.5%)           |
| Underweight at baseline, n (%)                        |                     |                     |                     |
| No                                                    | 265 (91.4%)         | 104 (91.2%)         | 369 (91.3%)         |
| Yes                                                   | 24 (8.3%)           | 10 (8.8%)           | 34 (8.4%)           |
| Missing                                               | 1 (0.3%)            | 0 (0%)              | 1 (0.2%)            |
| Wasted at baseline, n (%)                             |                     |                     |                     |
| No                                                    | 269 (92.8%)         | 109 (95.6%)         | 378 (93.6%)         |
| Yes                                                   | 11 (3.8%)           | 4 (3.5%)            | 15 (3.7%)           |
| Missing                                               | 10 (3.4%)           | 1 (0.9%)            | 11 (2.7%)           |

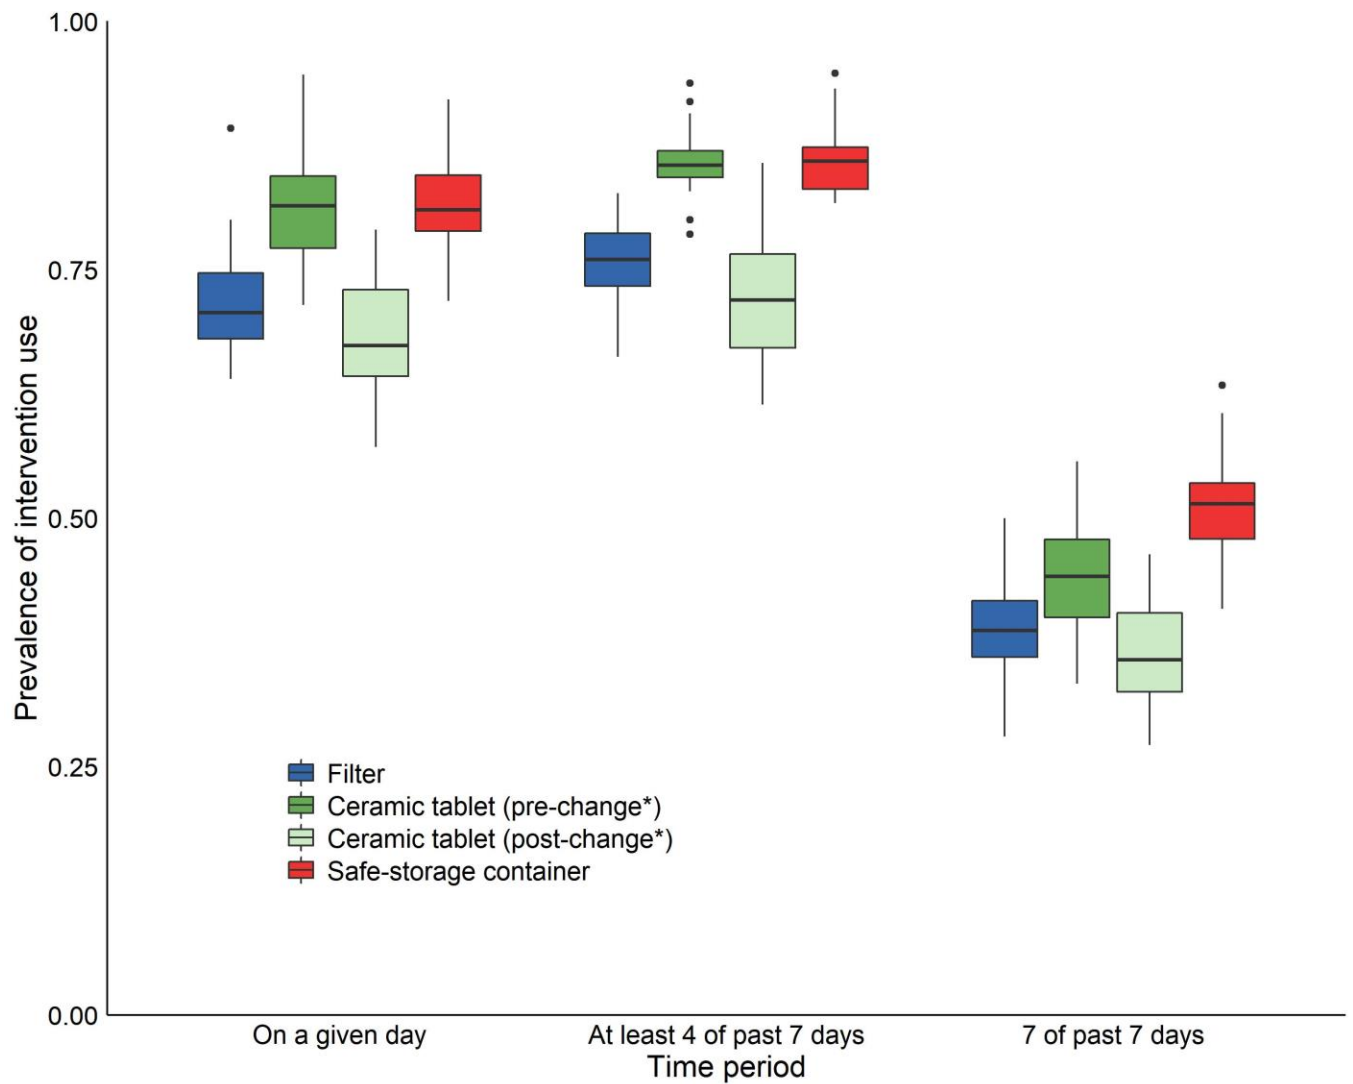

**Figure S1.** Objective intervention usage by intervention group as measured by the Smart Spout, a modified spigot that measured objective intervention usage based on the duration of each time the spigot was opened. Use on a given day was defined by the spigot being held open for at least 5 seconds, and results are reported for the prevalence of use on a given day, on at least 4 of the past 7 days, and on all 7 of the past 7 days.

\*Pre-change refers to the time period before the interventions for households in the ceramic tablet group were replaced with ceramic filters. Post-change refers to the time period after the interventions were replaced with ceramic filters for this group.

**Table S3.** Baseline differences in anthropometry among 402 children with anthropometry at baseline.

| Intervention    | N   | Mean (SD)    | Difference*<br>(95% CI) |
|-----------------|-----|--------------|-------------------------|
| <b>HAZ</b>      |     |              |                         |
| Filter          | 99  | -1.21 (1.20) | 0.42 (0.08, 0.76)       |
| Ceramic tablet  | 96  | -1.17 (1.39) | 0.46 (0.12, 0.80)       |
| Safe-storage    | 99  | -1.45 (1.14) | 0.21 (-0.13, 0.55)      |
| No intervention | 89  | -1.65 (1.37) | 0.                      |
| <b>WAZ</b>      |     |              |                         |
| Filter          | 98  | -0.23 (1.08) | 0.20 (-0.13, 0.53)      |
| Ceramic tablet  | 96  | -0.22 (1.18) | 0.22 (-0.12, 0.55)      |
| Safe-storage    | 101 | -0.34 (1.14) | 0.10 (-0.23, 0.43)      |
| No intervention | 96  | -0.43 (1.35) | 0.                      |
| <b>WHZ</b>      |     |              |                         |
| Filter          | 95  | 0.65 (1.20)  | 0.11 (-0.27, 0.48)      |
| Ceramic tablet  | 93  | 0.57 (1.41)  | 0.04 (-0.34, 0.41)      |
| Safe-storage    | 96  | 0.68 (1.38)  | 0.12 (-0.26, 0.49)      |
| No intervention | 88  | 0.56 (1.42)  | 0.                      |

\*Adjusted for age using cubic splines with 4 knots

**Table S4.** Age-specific effects of water treatment interventions on child growth among 288 children that completed 24 months of follow-up and had a baseline anthropometric measure.

| Baseline age                  | 0-11 months |                             |                                             | 12-23 months |                             |                                             | 24-35 months |                             |                                             |
|-------------------------------|-------------|-----------------------------|---------------------------------------------|--------------|-----------------------------|---------------------------------------------|--------------|-----------------------------|---------------------------------------------|
|                               | N children  | $\Delta Z$ -score Mean (SD) | Mean $\Delta Z$ -score difference* (95% CI) | N children   | $\Delta Z$ -score Mean (SD) | Mean $\Delta Z$ -score difference* (95% CI) | N children   | $\Delta Z$ -score Mean (SD) | Mean $\Delta Z$ -score difference* (95% CI) |
| <i>Height-for-age z-score</i> |             |                             |                                             |              |                             |                                             |              |                             |                                             |
| Filter                        | 30          | -1.25 (1.14)                | 0.35 (-0.35, 1.06)                          | 23           | 0.23 (0.74)                 | 0.08 (-0.45, 0.61)                          | 17           | 0.46 (0.68)                 | -0.19 (-0.76, 0.37)                         |
| Ceramic tablet                | 22          | -1.18 (1.31)                | 0.40 (-0.36, 1.16)                          | 27           | -0.25 (1.10)                | -0.24 (-0.75, 0.28)                         | 20           | 0.64 (0.85)                 | 0.03 (-0.49, 0.55)                          |
| Safe-storage                  | 25          | -0.99 (1.33)                | 0.57 (-0.17, 1.31)                          | 32           | 0.13 (0.90)                 | 0.05 (-0.44, 0.53)                          | 18           | 0.33 (0.68)                 | -0.23 (-0.78, 0.31)                         |
| No intervention               | 19          | -1.54 (1.05)                | 0.                                          | 23           | 0.08 (0.95)                 | 0.                                          | 19           | 0.50 (1.01)                 | 0.                                          |
| Combined intervention         | 52          | -1.22 (1.20)                | 0.05 (-0.45, 0.55)                          | 50           | -0.03 (0.98)                | -0.11 (-0.46, 0.24)                         | 37           | 0.56 (0.77)                 | 0.05 (-0.33, 0.43)                          |
| Combined control              | 44          | -1.23 (1.24)                | 0.                                          | 55           | 0.11 (0.91)                 | 0.                                          | 37           | 0.42 (0.86)                 | 0.                                          |
| <i>Weight-for-age z-score</i> |             |                             |                                             |              |                             |                                             |              |                             |                                             |
| Filter                        | 31          | -0.34 (1.11)                | -0.39 (-1.06, 0.27)                         | 22           | 0.18 (0.57)                 | 0.23 (-0.30, 0.76)                          | 17           | 0.15 (1.04)                 | 0.01 (-0.61, 0.62)                          |
| Ceramic tablet                | 24          | 0.02 (1.26)                 | -0.04 (-0.74, 0.66)                         | 26           | 0.10 (1.01)                 | 0.18 (-0.34, 0.69)                          | 20           | 0.42 (0.71)                 | 0.29 (-0.27, 0.85)                          |
| Safe-storage                  | 26          | 0.01 (1.03)                 | -0.15 (-0.85, 0.55)                         | 33           | 0.08 (1.00)                 | 0.12 (-0.36, 0.60)                          | 20           | 0.00 (0.72)                 | -0.05 (-0.62, 0.52)                         |
| No intervention               | 19          | 0.03 (1.32)                 | 0.                                          | 23           | -0.02 (0.76)                | 0.                                          | 20           | 0.07 (1.00)                 | 0.                                          |
| Combined intervention         | 55          | -0.18 (1.18)                | -0.15 (-0.61, 0.31)                         | 48           | 0.14 (0.83)                 | 0.13 (-0.21, 0.48)                          | 37           | 0.29 (0.88)                 | 0.20 (-0.21, 0.61)                          |
| Combined control              | 45          | 0.01 (1.15)                 | 0.                                          | 56           | 0.04 (0.90)                 | 0.                                          | 40           | 0.04 (0.86)                 | 0.                                          |



*Weight-for-height z-score*

|                       |    |             |                     |    |             |                    |    |              |                     |
|-----------------------|----|-------------|---------------------|----|-------------|--------------------|----|--------------|---------------------|
| Filter                | 30 | 0.37 (1.44) | -0.73 (-1.83, 0.37) | 22 | 0.31 (0.90) | 0.20 (-0.61, 1.01) | 16 | 0.11 (1.66)  | 0.17 (-0.82, 1.17)  |
| Ceramic tablet        | 22 | 0.71 (2.34) | -0.45 (-1.63, 0.74) | 26 | 0.58 (1.41) | 0.34 (-0.44, 1.12) | 20 | 0.31 (1.42)  | 0.38 (-0.51, 1.27)  |
| Safe-storage          | 24 | 0.43 (1.72) | -0.70 (-1.87, 0.46) | 32 | 0.22 (1.40) | 0.03 (-0.70, 0.77) | 18 | -0.23 (1.03) | -0.11 (-1.06, 0.83) |
| No intervention       | 18 | 0.99 (2.13) | 0.                  | 22 | 0.21 (1.44) | 0.                 | 19 | -0.10 (1.46) | 0.                  |
| Combined intervention | 52 | 0.51 (1.86) | -0.22 (-0.99, 0.56) | 48 | 0.45 (1.20) | 0.25 (-0.27, 0.78) | 36 | 0.22 (1.51)  | 0.35 (-0.31, 1.01)  |
| Combined control      | 42 | 0.67 (1.90) | 0.                  | 54 | 0.22 (1.41) | 0.                 | 37 | -0.17 (1.25) | 0.                  |

---

\*Adjusted for age using cubic splines with 4 knots

**Table S5.** Intervention effects on stunting among 276 children that completed 24 months of follow-up and had a baseline height measured.

| Intervention             | N children | Stunted at baseline<br>N (%) | Stunted at 24<br>months<br>N (%) | Risk ratio (95%<br>CI) |
|--------------------------|------------|------------------------------|----------------------------------|------------------------|
| Filter                   | 70         | 13 (18.6)                    | 16 (22.9)                        | 0.56 (0.30, 1.03)      |
| Ceramic tablet           | 69         | 20 (29.0)                    | 17 (24.6)                        | 0.63 (0.34, 1.16)      |
| Safe-storage             | 75         | 22 (29.3)                    | 20 (26.7)                        | 0.62 (0.35, 1.11)      |
| No intervention          | 62         | 24 (38.7)                    | 29 (46.8)                        | 1.                     |
| Combined<br>intervention | 139        | 33 (23.7)                    | 33 (23.7)                        | 0.73 (0.46, 1.15)      |
| Combined control         | 137        | 46 (33.6)                    | 49 (35.8)                        | 1.                     |

\*Adjusted for age using cubic splines with 4 knots and a quadratic term for baseline length-for-age z-score.

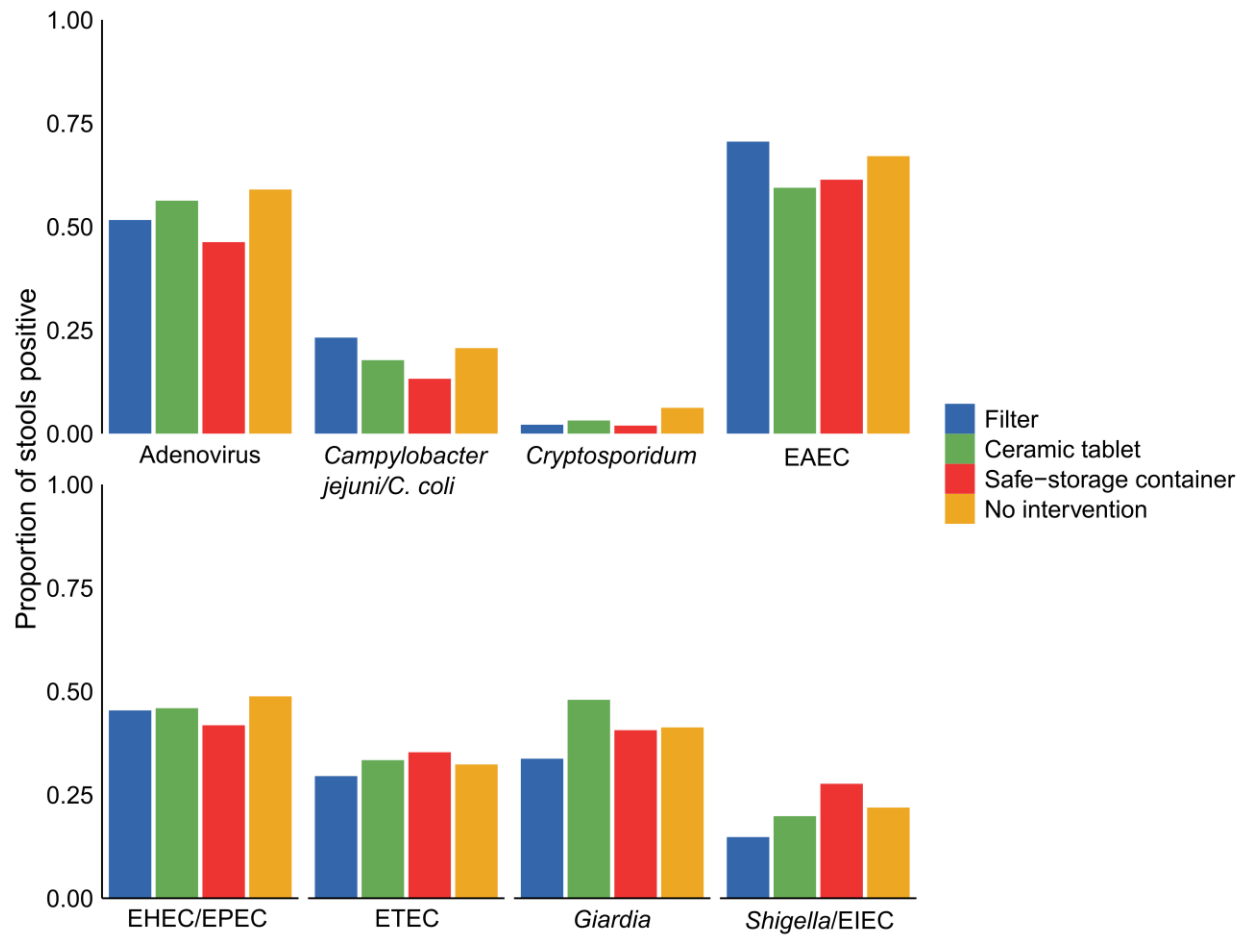

**Figure S2.** Enteric infection prevalence by intervention group at baseline among 394 children.

EAEC: enteroaggregative *E. coli*; EHEC: enterohemorrhagic *E. coli*; EPEC: enteropathogenic *E. coli*; ETEC: enterotoxigenic *E. coli*; EIEC: enteroinvasive *E. coli*

**Table S6.** Intention-to-treat intervention effects on prevalence of enteric pathogens at 6, 12, 18, and 24 months of follow-up among 365 children.

| Pathogen                 | Intervention          | N samples validly tested | Prevalence N (%) | Prevalence ratio* (95% CI) |
|--------------------------|-----------------------|--------------------------|------------------|----------------------------|
| EAEC                     | Filter                | 313                      | 134 (42.8)       | 1.08 (0.91, 1.28)          |
|                          | Ceramic tablet        | 298                      | 134 (45.0)       | 1.17 (0.99, 1.38)          |
|                          | Safe-storage          | 343                      | 119 (34.7)       | 0.88 (0.72, 1.07)          |
|                          | No intervention       | 273                      | 105 (38.5)       | 1.                         |
|                          | Combined intervention | 611                      | 268 (43.9)       | 1.20 (1.06, 1.36)          |
|                          | Combined control      | 616                      | 224 (36.4)       | 1.                         |
| EHEC/EPEC                | Filter                | 303                      | 123 (40.6)       | 0.97 (0.79, 1.19)          |
|                          | Ceramic tablet        | 289                      | 131 (45.3)       | 1.10 (0.92, 1.33)          |
|                          | Safe-storage          | 329                      | 142 (43.2)       | 1.03 (0.86, 1.24)          |
|                          | No intervention       | 260                      | 107 (41.2)       | 1.                         |
|                          | Combined intervention | 592                      | 254 (42.9)       | 1.02 (0.89, 1.16)          |
|                          | Combined control      | 589                      | 249 (42.3)       | 1.                         |
| <i>Giardia</i>           | Filter                | 313                      | 90 (28.8)        | 0.80 (0.60, 1.06)          |
|                          | Ceramic tablet        | 300                      | 107 (35.7)       | 0.98 (0.78, 1.24)          |
|                          | Safe-storage          | 344                      | 105 (30.5)       | 0.86 (0.66, 1.11)          |
|                          | No intervention       | 273                      | 101 (37.0)       | 1.                         |
|                          | Combined intervention | 613                      | 197 (32.1)       | 0.96 (0.80, 1.16)          |
|                          | Combined control      | 617                      | 206 (33.4)       | 1.                         |
| <i>C. jejuni/C. coli</i> | Filter                | 308                      | 22 (7.1)         | 1.15 (0.66, 1.99)          |
|                          | Ceramic tablet        | 298                      | 22 (7.4)         | 1.09 (0.62, 1.93)          |
|                          | Safe-storage          | 341                      | 17 (5.0)         | 0.76 (0.40, 1.45)          |
|                          | No intervention       | 271                      | 17 (6.3)         | 1.                         |

|                        |                       |     |            |                   |
|------------------------|-----------------------|-----|------------|-------------------|
|                        | Combined intervention | 606 | 44 (7.3)   | 1.29 (0.85, 1.98) |
|                        | Combined control      | 612 | 34 (5.6)   | 1.                |
| <i>Cryptosporidium</i> | Filter                | 312 | 11 (3.5)   | 1.89 (0.69, 5.14) |
|                        | Ceramic tablet        | 299 | 10 (3.3)   | 1.81 (0.65, 5.03) |
|                        | Safe-storage          | 344 | 7 (2.0)    | 1.09 (0.36, 3.27) |
|                        | No intervention       | 271 | 5 (1.8)    | 1.                |
|                        | Combined intervention | 611 | 21 (3.4)   | 1.76 (0.90, 3.44) |
|                        | Combined control      | 615 | 12 (2.0)   | 1.                |
| ETEC                   | Filter                | 296 | 49 (16.6)  | 0.90 (0.63, 1.29) |
|                        | Ceramic tablet        | 283 | 49 (17.3)  | 0.96 (0.69, 1.33) |
|                        | Safe-storage          | 321 | 45 (14.0)  | 0.86 (0.61, 1.22) |
|                        | No intervention       | 253 | 40 (15.8)  | 1.                |
|                        | Combined intervention |     |            | 1.01 (0.79, 1.29) |
|                        | Combined control      |     |            | 1.                |
| <i>Shigella/EIEC</i>   | Filter                | 312 | 50 (16.0)  | 1.31 (0.89, 1.91) |
|                        | Ceramic tablet        | 298 | 46 (15.4)  | 1.23 (0.83, 1.82) |
|                        | Safe-storage          | 343 | 41 (12.0)  | 0.98 (0.67, 1.45) |
|                        | No intervention       | 271 | 33 (12.2)  | 1.                |
|                        | Combined intervention | 610 | 96 (15.7)  | 1.28 (0.98, 1.67) |
|                        | Combined control      | 614 | 74 (12.1)  | 1.                |
| Adenovirus             | Filter                | 291 | 95 (32.6)  | 1.28 (0.97, 1.71) |
|                        | Ceramic tablet        | 276 | 90 (32.6)  | 1.29 (0.99, 1.68) |
|                        | Safe-storage          | 322 | 95 (29.5)  | 1.21 (0.92, 1.60) |
|                        | No intervention       | 251 | 61 (24.3)  | 1.                |
|                        | Combined intervention | 567 | 185 (32.6) | 1.15 (0.97, 1.36) |

|                                                    |                          |     |            |                   |
|----------------------------------------------------|--------------------------|-----|------------|-------------------|
|                                                    | Combined control         | 573 | 156 (27.2) | 1.                |
| Total number of<br>pathogens detected <sup>†</sup> | Filter                   | 313 | 2 (1, 3)   | 1.06 (0.93, 1.20) |
|                                                    | Ceramic tablet           | 300 | 2 (1, 3)   | 1.13 (1.00, 1.28) |
|                                                    | Safe-storage             | 344 | 1 (1, 3)   | 0.97 (0.85, 1.10) |
|                                                    | No intervention          | 273 | 1 (1, 2)   | 1.                |
|                                                    | Combined<br>intervention | 613 | 2 (1, 3)   | 1.11 (1.02, 1.21) |
|                                                    | Combined control         | 617 | 1 (1, 2)   | 1.                |

---

\*Adjusted for age and year of stool testing.

<sup>†</sup>Effects estimated are detection rate ratios.

EAEC: enteroaggregative *E. coli*; EHEC: enterohemorrhagic *E. coli*; EPEC: enteropathogenic *E. coli*; ETEC: enterotoxigenic *E. coli*; EIEC: enteroinvasive *E. coli*

**Table S7.** As-treated intervention effects on prevalence of enteric pathogens at 6, 12, 18, and 24 months of follow-up among 365 children.

| Pathogen                 | Intervention                       | N samples validly tested | Prevalence N (%) | Prevalence ratio* (95% CI) |
|--------------------------|------------------------------------|--------------------------|------------------|----------------------------|
| EAEC                     | Filter                             | 186                      | 88 (47.3)        | 1.03 (0.85, 1.25)          |
|                          | No silver filter                   | 276                      | 103 (37.3)       | 1.28 (0.93, 1.75)          |
|                          | Ceramic tablet                     | 149                      | 77 (51.7)        | 1.12 (0.94, 1.33)          |
|                          | Safe-storage                       | 343                      | 119 (34.7)       | 0.88 (0.72, 1.07)          |
|                          | No intervention                    | 273                      | 105 (38.5)       | 1.                         |
|                          | Combined intervention <sup>†</sup> | 335                      | 165 (49.3)       | 1.15 (1.00, 1.32)          |
|                          | Combined control                   | 616                      | 224 (36.4)       | 1.                         |
| EHEC/EPEC                | Filter                             | 176                      | 79 (44.9)        | 1.00 (0.79, 1.25)          |
|                          | No silver filter                   | 278                      | 106 (38.1)       | 1.09 (0.82, 1.45)          |
|                          | Ceramic tablet                     | 138                      | 69 (50.0)        | 1.11 (0.90, 1.38)          |
|                          | Safe-storage                       | 329                      | 142 (43.2)       | 1.04 (0.86, 1.25)          |
|                          | No intervention                    | 260                      | 107 (41.2)       | 1.                         |
|                          | Combined intervention <sup>†</sup> | 314                      | 148 (47.1)       | 1.03 (0.88, 1.20)          |
|                          | Combined control                   | 589                      | 249 (42.3)       | 1.                         |
| <i>Giardia</i>           | Filter                             | 186                      | 52 (28.0)        | 0.78 (0.58, 1.05)          |
|                          | No silver filter                   | 278                      | 103 (37.1)       | 0.99 (0.75, 1.31)          |
|                          | Ceramic tablet                     | 149                      | 42 (28.2)        | 0.75 (0.54, 1.04)          |
|                          | Safe-storage                       | 344                      | 105 (30.5)       | 0.85 (0.66, 1.10)          |
|                          | No intervention                    | 273                      | 101 (37.0)       | 1.                         |
|                          | Combined intervention <sup>†</sup> | 335                      | 94 (28.1)        | 0.84 (0.67, 1.05)          |
|                          | Combined control                   | 617                      | 206 (33.4)       | 1.                         |
| <i>C. jejuni/C. coli</i> | Filter                             | 181                      | 17 (9.4)         | 1.11 (0.63, 1.94)          |

|                        |                                    |     |           |                   |
|------------------------|------------------------------------|-----|-----------|-------------------|
|                        | No silver filter                   | 278 | 12 (4.3)  | -- <sup>‡</sup>   |
|                        | Ceramic tablet                     | 147 | 15 (10.2) | 0.99 (0.53, 1.84) |
|                        | Safe-storage                       | 341 | 17 (5.0)  | 0.76 (0.40, 1.45) |
|                        | No intervention                    | 271 | 17 (6.3)  | 1.                |
|                        | Combined intervention <sup>†</sup> | 328 | 32 (9.8)  | 1.21 (0.79, 1.85) |
|                        | Combined control                   | 612 | 34 (5.6)  | 1.                |
| <i>Cryptosporidium</i> | Filter                             | 185 | 7 (3.8)   | 1.73 (0.60, 5.00) |
|                        | No silver filter                   | 278 | 11 (4.0)  | -- <sup>‡</sup>   |
|                        | Ceramic tablet                     | 148 | 3 (2.0)   | 0.90 (0.23, 3.57) |
|                        | Safe-storage                       | 344 | 7 (2.0)   | 1.07 (0.35, 3.20) |
|                        | No intervention                    | 271 | 5 (1.8)   | 1.                |
|                        | Combined intervention <sup>†</sup> | 333 | 10 (3.0)  | 1.33 (0.63, 2.80) |
|                        | Combined control                   | 615 | 12 (2.0)  | 1.                |
| ETEC                   | Filter                             | 169 | 31 (18.3) | 0.76 (0.52, 1.13) |
|                        | No silver filter                   | 278 | 32 (11.5) | -- <sup>‡</sup>   |
|                        | Ceramic tablet                     | 132 | 35 (26.5) | 0.92 (0.65, 1.31) |
|                        | Safe-storage                       | 321 | 45 (14.0) | 0.86 (0.61, 1.22) |
|                        | No intervention                    | 253 | 40 (15.8) | 1.                |
|                        | Combined intervention <sup>†</sup> | 301 | 66 (21.9) | 0.91 (0.70, 1.19) |
|                        | Combined control                   | 574 | 85 (14.8) | 1.                |
| <i>Shigella/EIEC</i>   | Filter                             | 185 | 32 (17.3) | 1.26 (0.82, 1.93) |
|                        | No silver filter                   | 278 | 36 (12.9) | 1.23 (0.71, 2.13) |
|                        | Ceramic tablet                     | 147 | 28 (19.0) | 1.28 (0.79, 2.06) |
|                        | Safe-storage                       | 343 | 41 (12.0) | 0.98 (0.67, 1.45) |
|                        | No intervention                    | 271 | 33 (12.2) | 1.                |



|                                                 |                                    |     |            |                   |
|-------------------------------------------------|------------------------------------|-----|------------|-------------------|
|                                                 | Combined intervention <sup>†</sup> | 332 | 60 (18.1)  | 1.28 (0.98, 1.67) |
|                                                 | Combined control                   | 614 | 74 (12.1)  | 1.                |
| Adenovirus                                      | Filter                             | 184 | 66 (35.9)  | 1.30 (0.96, 1.76) |
|                                                 | No silver filter                   | 235 | 63 (26.8)  | 1.28 (0.84, 1.96) |
|                                                 | Ceramic tablet                     | 148 | 56 (37.8)  | 1.32 (0.98, 1.76) |
|                                                 | Safe-storage                       | 322 | 95 (29.5)  | 1.22 (0.93, 1.61) |
|                                                 | No intervention                    | 251 | 61 (24.3)  | 1.                |
|                                                 | Combined intervention <sup>†</sup> | 332 | 122 (36.7) | 1.16 (0.95, 1.42) |
|                                                 | Combined control                   | 573 | 156 (27.2) | 1.                |
| Total number of pathogens detected <sup>§</sup> | Filter                             | 186 | 2 (1, 3)   | 1.02 (0.89, 1.18) |
|                                                 | No silver filter                   | 278 | 2 (1, 2)   | 1.18 (0.99, 1.40) |
|                                                 | Ceramic tablet                     | 149 | 2 (1, 3)   | 1.05 (0.90, 1.21) |
|                                                 | Safe-storage                       | 344 | 1 (1, 3)   | 0.97 (0.85, 1.10) |
|                                                 | No intervention                    | 273 | 1 (1, 2)   | 1.                |
|                                                 | Combined intervention <sup>†</sup> | 335 | 2 (1, 3)   | 1.05 (0.95, 1.17) |
|                                                 | Combined control                   | 617 | 1 (1, 2)   | 1.                |

\*Adjusted for age and year of stool testing.

<sup>†</sup>Excludes no silver filter group.

<sup>‡</sup>Model did not converge.

<sup>§</sup>Effects estimated are detection rate ratios.

EAEC: enteroaggregative *E. coli*; EHEC: enterohemorrhagic *E. coli*; EPEC: enteropathogenic *E. coli*; ETEC: enterotoxigenic *E. coli*; EIEC: enteroinvasive *E. coli*

**Table S8.** Intention-to-treat intervention effects on prevalence of enteric pathogens at 6, 12, 18, and 24 months of follow-up among 349 children, excluding samples tested in 2016 and 2017.

| Pathogen                 | Intervention          | N samples validly tested | Prevalence N (%) | Prevalence ratio* (95% CI) |
|--------------------------|-----------------------|--------------------------|------------------|----------------------------|
| EAEC                     | Filter                | 247                      | 89 (36.0)        | 1.16 (0.91, 1.40)          |
|                          | Ceramic tablet        | 231                      | 81 (35.1)        | 1.15 (0.89, 1.50)          |
|                          | Safe-storage          | 277                      | 86 (31.0)        | 1.02 (0.78, 1.33)          |
|                          | No intervention       | 215                      | 65 (30.2)        | 1.                         |
|                          | Combined intervention | 202                      | 67 (33.2)        | 1.14 (0.96, 1.36)          |
|                          | Combined control      | 492                      | 151 (30.7)       | 1.                         |
| EHEC/EPEC                | Filter                | 247                      | 91 (36.8)        | 0.98 (0.76, 1.25)          |
|                          | Ceramic tablet        | 233                      | 93 (39.9)        | 1.07 (0.84, 1.35)          |
|                          | Safe-storage          | 278                      | 118 (42.4)       | 1.14 (0.91, 1.41)          |
|                          | No intervention       | 215                      | 80 (37.2)        | 1.                         |
|                          | Combined intervention | 202                      | 78 (38.6)        | 0.95 (0.81, 1.11)          |
|                          | Combined control      | 493                      | 198 (40.2)       | 1.                         |
| <i>Giardia</i>           | Filter                | 269                      | 70 (26.0)        | 0.77 (0.56, 1.06)          |
|                          | Ceramic tablet        | 253                      | 92 (36.4)        | 1.09 (0.85, 1.39)          |
|                          | Safe-storage          | 294                      | 89 (30.3)        | 0.96 (0.79, 1.17)          |
|                          | No intervention       | 230                      | 80 (34.8)        | 1.                         |
|                          | Combined intervention | 244                      | 59 (24.2)        | 0.96 (0.79, 1.17)          |
|                          | Combined control      | 524                      | 169 (32.3)       | 1.                         |
| <i>C. jejuni/C. coli</i> | Filter                | 269                      | 15 (5.6)         | 1.20 (0.56, 2.58)          |
|                          | Ceramic tablet        | 253                      | 14 (5.5)         | 1.19 (0.54, 2.63)          |
|                          | Safe-storage          | 294                      | 13 (4.4)         | 0.95 (0.43, 2.08)          |
|                          | No intervention       | 230                      | 10 (4.3)         | 1.                         |

|                        |                       |     |           |                   |
|------------------------|-----------------------|-----|-----------|-------------------|
|                        | Combined intervention | 244 | 17 (7.0)  | 1.23 (0.72, 2.10) |
|                        | Combined control      | 524 | 23 (4.4)  | 1.                |
| <i>Cryptosporidium</i> | Filter                | 269 | 10 (3.7)  | 2.80 (0.80, 9.77) |
|                        | Ceramic tablet        | 253 | 9 (3.6)   | 2.70 (0.76, 9.58) |
|                        | Safe-storage          | 294 | 6 (2.0)   | 1.51 (0.39, 5.85) |
|                        | No intervention       | 230 | 3 (1.3)   | 1.                |
|                        | Combined intervention | 244 | 8 (3.3)   | 2.14 (1.01, 4.56) |
|                        | Combined control      | 524 | 9 (1.7)   | 1.                |
| ETEC                   | Filter                | 240 | 28 (11.7) | 1.30 (0.75, 2.27) |
|                        | Ceramic tablet        | 226 | 23 (10.2) | 1.17 (0.66, 2.10) |
|                        | Safe-storage          | 269 | 23 (8.6)  | 0.96 (0.53, 1.75) |
|                        | No intervention       | 209 | 18 (8.6)  | 1.                |
|                        | Combined intervention | 188 | 19 (10.1) | 1.24 (0.84, 1.84) |
|                        | Combined control      | 478 | 41 (8.6)  | 1.                |
| <i>Shigella/EIEC</i>   | Filter                | 240 | 30 (12.5) | 1.17 (0.72, 1.87) |
|                        | Ceramic tablet        | 226 | 33 (14.6) | 1.37 (0.84, 2.25) |
|                        | Safe-storage          | 269 | 25 (9.3)  | 0.87 (0.52, 1.46) |
|                        | No intervention       | 209 | 22 (10.5) | 1.                |
|                        | Combined intervention | 188 | 27 (14.4) | 1.37 (0.97, 1.92) |
|                        | Combined control      | 478 | 47 (9.8)  | 1.                |
| Adenovirus             | Filter                | 220 | 61 (27.7) | 1.23 (0.84, 1.81) |
|                        | Ceramic tablet        | 203 | 66 (32.5) | 1.47 (1.03, 2.10) |
|                        | Safe-storage          | 247 | 64 (25.9) | 1.15 (0.80, 1.66) |
|                        | No intervention       | 189 | 42 (22.2) | 1.                |
|                        | Combined intervention | 188 | 64 (34.0) | 1.17 (0.93, 1.47) |

|                                                    |                          |     |            |                   |
|----------------------------------------------------|--------------------------|-----|------------|-------------------|
|                                                    | Combined control         | 436 | 106 (24.3) | 1.                |
| Total number of<br>pathogens detected <sup>†</sup> | Filter                   | 247 | 1 (1, 2)   | 1.06 (0.91, 1.23) |
|                                                    | Ceramic tablet           | 233 | 2 (1, 2)   | 1.19 (1.02, 1.37) |
|                                                    | Safe-storage             | 278 | 1 (1, 2)   | 1.03 (0.89, 1.20) |
|                                                    | No intervention          | 215 | 1 (1, 2)   | 1.                |
|                                                    | Combined<br>intervention | 480 | 1 (1, 2)   | 1.10 (0.99, 1.22) |
|                                                    | Combined control         | 493 | 1 (1, 2)   | 1.                |

---

\*Adjusted for age and year of stool testing.

<sup>†</sup>Effects estimated are detection rate ratios.

EAEC: enteroaggregative *E. coli*; EHEC: enterohemorrhagic *E. coli*; EPEC: enteropathogenic *E. coli*; ETEC: enterotoxigenic *E. coli*; EIEC: enteroinvasive *E. coli*
